# Supplementary material
Source: PubMed Central journal article supplement (PMC2174883)
Supplement: plntcell_tpc.107.055467_1.pdf [file plntcell_tpc.107.055467_1.pdf]

Supplemental Data. Ito et al. (2007). The homeotic protein AGAMOUS controls late stamen development by regulating a jasmonate biosynthetic gene in *Arabidopsis*.

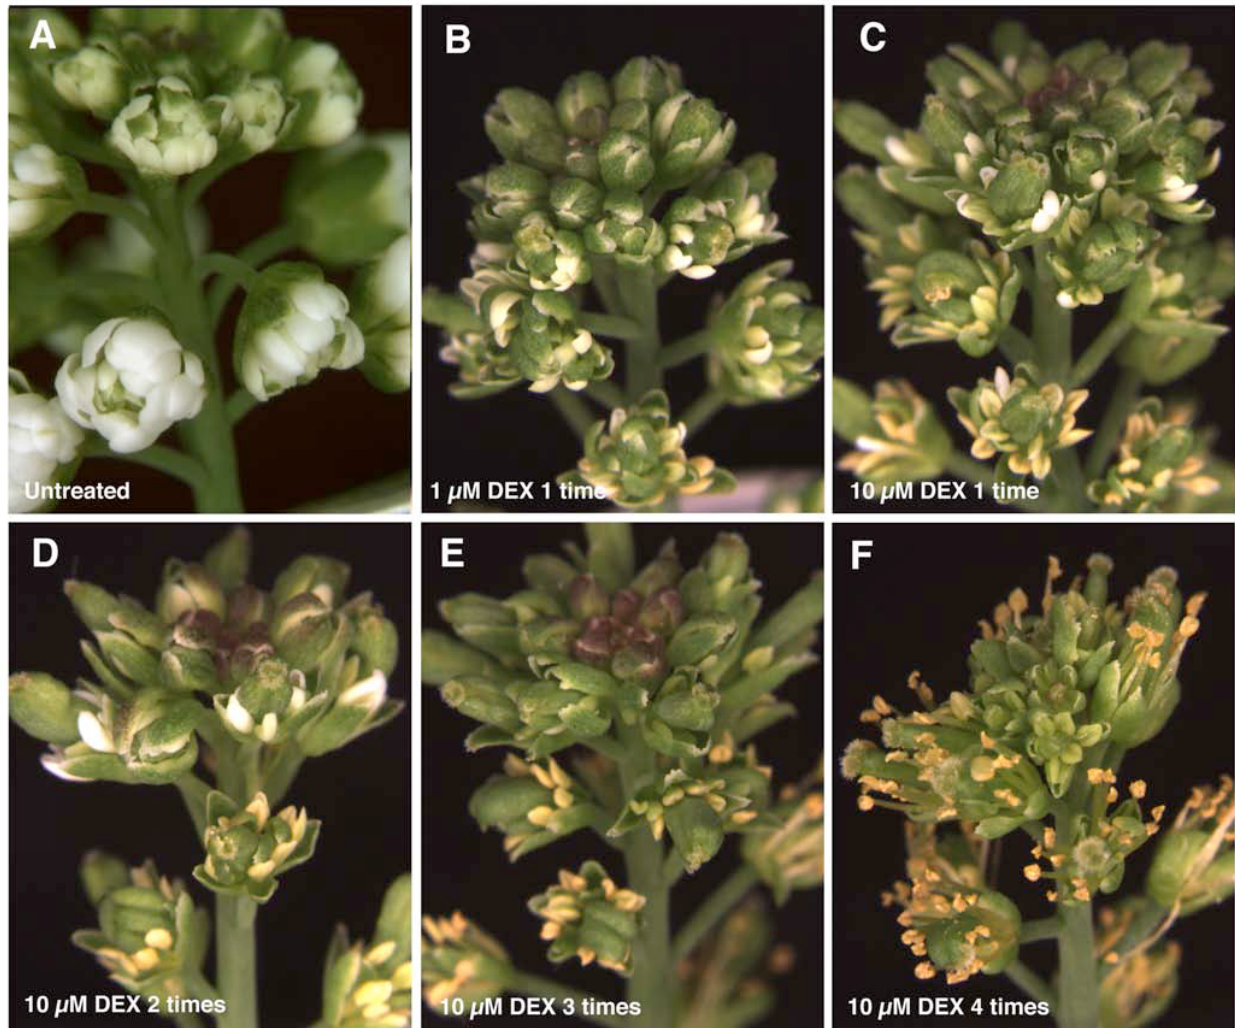

**Supplemental figure 1. Inflorescences 12 days after a series of DEX treatments.**

**Supplemental Figure 1.** Timed induction of AG activity.

Inflorescences of *ag-1 35S:AG-GR* were untreated (A) or treated once with 1 μM DEX (B), once (C), twice (D), three times (E) and four times (F) with 10 μM DEX at 12-hour intervals. Photos were taken 12 days after the initial treatments.

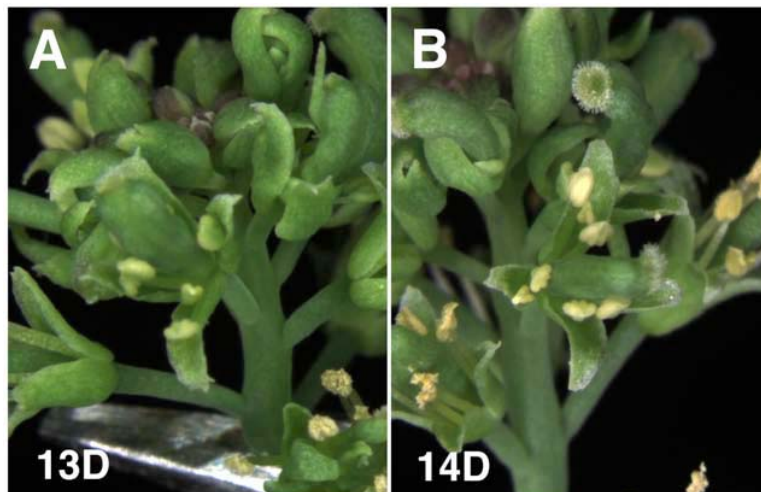

Supplemental figure 2. Flowers at anthesis in day 13 or 14 after 4 times of DEX treatments

**Supplemental Figure 2.** Effects of 4 DEX treatments to floral buds at earlier stages than stage 3. Inflorescences of *ag-1 35S:AG-GR* were treated four times with 10  $\mu$ M DEX at 12 hour intervals. Photos were taken after 13 days (A) or 14 days (B) from the initial treatments.

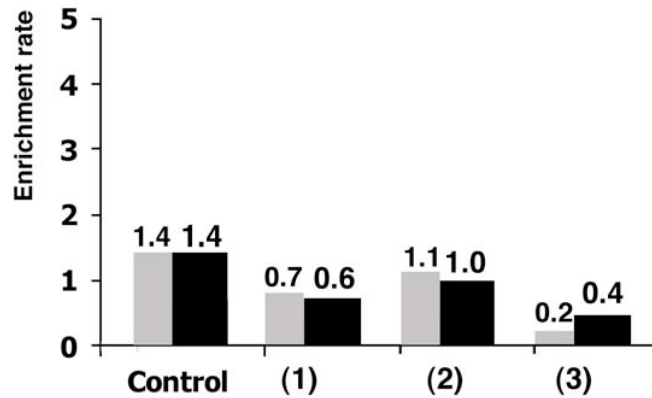

Supplemental figure 3 ChIP assay using *ag-1 35S::AG-GR* in day 3 after DEX treatments

**Supplemental Figure 3.** ChIP assay using *ag-1 35S::AG-GR* inflorescences in day 3 after DEX treatments. Nuclear extract of *ag-1 35S::AG-GR* inflorescences in day 3 after DEX treatments was immunopurified by AG-specific antibody (shown as black bars) or IgG control (gray bars). Primers used for analysis were shown in A and supplemental Table 1. Y-axis shows enrichment rates compared with an unrelated control gene. In day 3, no significant enrichment of *DAD1* promoter regions were observed.

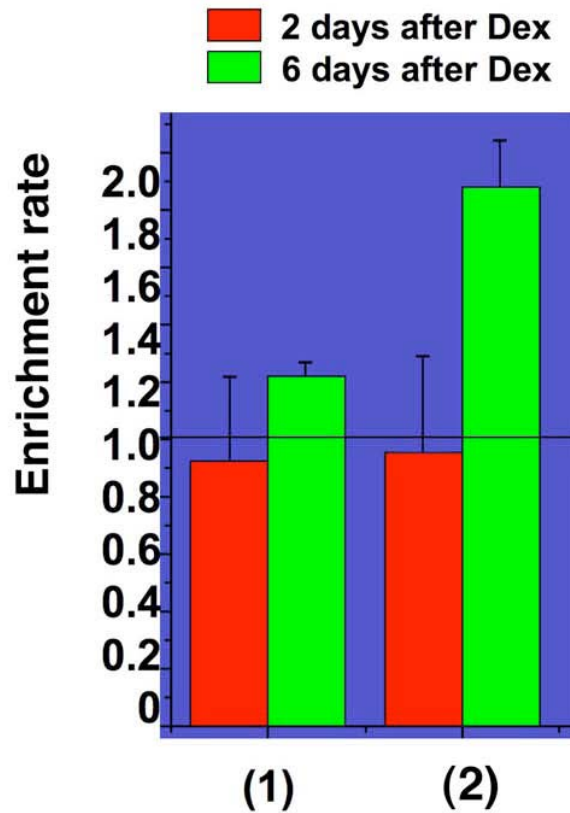

**Supplemental figure 4**  
**ChIP assay using *ap1 cal 35S::AP1-GR***  
**2 days and 6 days after treatment**

**Supplemental Figure 4.** ChIP assay of AG binding to *DAD1* promoter in *ap1 cal 35:AP1-GR*. The inflorescences were treated once with 1  $\mu$ M DEX and harvested 2 days or 6 days after treatment. The floral buds reached stage 3 and stage 8-9 in 2 days and 6 days after the treatment, respectively {Wellmer, 2006 #117}. The experiment was performed in the same way as that shown in figure 7I. In day 2 samples, no enrichment was observed, but in day 6 samples, weak but distinct enrichment was detected. Bars show standard errors.

**Supplemental Table 1.** Primer sequences used in this study.

All are shown in 5'-3' direction.

**RT-PCR primers.**

DAD1-F, TTACGGCGACGAGCCGTTAAGTGTA

DAD1-R, TGGAGA ACTCTCCGAGCTGTTTCTCT

COI1-F, CCAATACTATTTCCATTCGCGGCC

COI1-R, CACGTTTGGACTGTACTGTCCGATGT

OPR3-F, CCCACATGTGCCTGGAATCTATTCAG

OPR3-R, AGCCCGAGTGATAGTGGGTCAGAAT

**Real-time PCR primers (two sets of *DAD1* primers were tested showing similar results).**

DAD1R-1F, ACGATAACCGGTCACAGCCTCG

DAD1R-1R, TGTTTCCGACACGTGGACCTCC

DAD1R-2F, TCGGTAAGGAGCTTCGGCTGAG

DAD1R-2R, CTGAATGGACACGTGGAGCTCAC

COI1R-F, GTGAGCGAGCAATCGCTGCAGC

COL1R-R, CAGCTCGATGTTCCAGTACGGTC

OPR3R-F, GGACGCAACTGATTCTGACCCAC

OPR3R-R, CGTAGGCGTGGTAGCGAGGTTG

**Cloning of *DAD1* promoter.**

DAD1-5A2, CACCTTGCATGTAAACTTAATGTCACTATTCCCTA

DAD1-5B, ATCTCCGGCCAAGCTTAACCGGGA

**Mutagenesis of CArG box.**

DAD1-5'MA2

GTGTAGTAGTACCTTCACTAGGAAAACACCACGTCGTTTCTTATATAAGTG

DAD1-5'MB2

CACTTATATAAGAAACGACGTGGTGTTCCTAGTGAAGGTACTACTACAC

**ChIP primers.**

DAD1C-1F, ACGTAGAATCCATTCATGATCCCAAATAT

DAD1C-1R, GTGGTACACATAAGCTATGTTTGCTC

DAD1C-2F, AACACACACACACTTTCTCAACAAT  
DAD1C-2R, CATTGACGATTCGACGTCGTACCAC  
DAD1C-3F, AGATGACAGCGTCGATAATGCC  
DAD1C-3R, TACCGATTTCAGCGTAAACCC  
Mu-likeF, GATTTACAAGGAATCTGTTGGTGGT  
Mu-likeR, CATAACATAGGTTTAGAGCATCTGC  
PFK-1F, TGGCATCACAATTAGATTTGATCGG  
PFK-1R, TACAGAAGTCACACGGCTATTCGTC

**Sequencing primers for *DAD1* promoter constructs.**

DAD1-7A, CCTTTGTGTTGAGTAATTCGTTGTATAGGC  
DAD1-7B, CCGTTAAACCATCAGAAGCCAGCTAACA  
DAD1-8A, GTGGTGTGTAGTATTGTGTCCACAAATATATG  
DAD1-8B, GGAGTGATAGCCATGACATCAACT  
DAD1-90B, GATAACCATCGTGATTTCTGAAAGACTG  
DAD1-9A, GCATTCAAACGATGTGATAATGTGAAATGC  
DAD1-9B, GCATTTACATTATCACATCGTTTGAATGC  
DAD1-10A, GCACAAGACTAATATATAAAGAGCTACGAC  
DAD1-10B, GTTGGAGTGATGTGTTGTTCCGGGC  
DAD1-11A, CGACGGTCAGATATTTATTTTCGATACACAC  
DAD1-11B, AAGGATTTAACCGAATTGGTGACCA  
DAD1-120B, GTGATTGAAGGAAAGAGGAAATGGG  
DAD1-12A, CAACAATCTCTTTAACTCCACTATAGATCCC  
DAD1-13A, GGAACCGCCACGTGTCTCGA  
DAD1-13B, GAACTTTGGTGATGACGTCGTCGG  
DAD1-14A, GCGTCGATAATGCCGAGCTGGA  
DAD1-15A, GGCGGCGAATGGCTAAAGCC  
DAD1-15B, GGGACTGGACACGTGGGAGT  
DAD1-16A, CCCAGCTATTGTTAGCTTTCTAATTTGG  
DAD1-16B, GGACTCGACTCTGAAAATTGTGGACAG  
DAD1- 40B, CCACGCCCTTCTAGGCTTCTAG
